# Supplementary material for: Low Frequency Sinusoidal Electromagnetic Field Accelerating Intervertebral Fusion through YAP/β-catenin Axis
Source: Research Square preprint supplement (doi:10.21203/rs.3.rs-7618226/v1), 2025-12-09
Supplement: Supplementary file 1 [file f37b8381e1f18c33b5a274b3.docx]

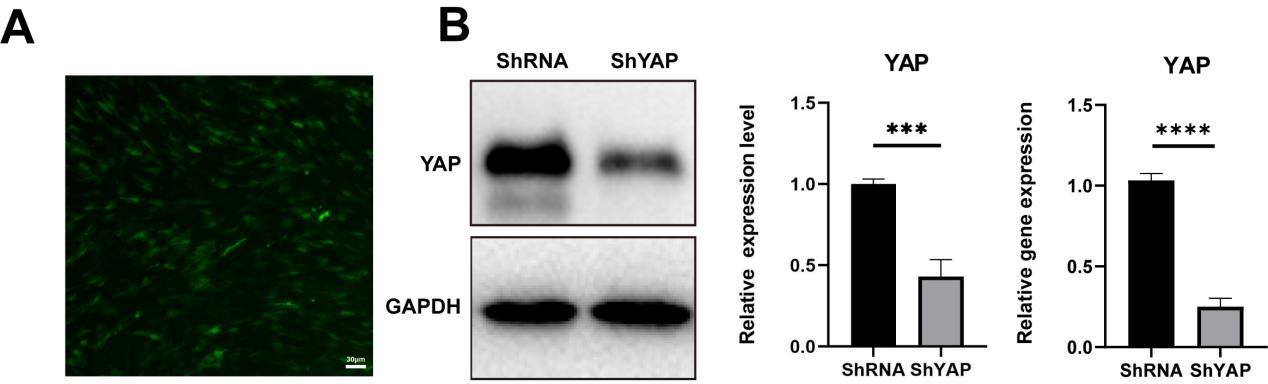


Fig.S1.（A）Representative fluorescence images of BMSCs after lentivirus transfection.（B）

WB and qRT-PCR were used to verify the knockdown of YAP. (n=3 ****P* < 0.001，*****P* < 0.0001).

Runx2


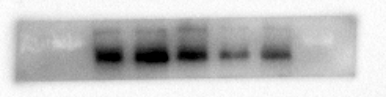


ALP


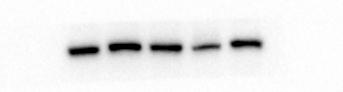


GAPDH


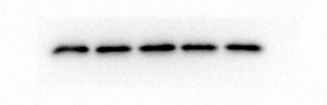


Fig.S2.The original blots generated alternative repeats of Western blotting analysis of Figure 3A.

Nuc-β-catenin

β-catenin


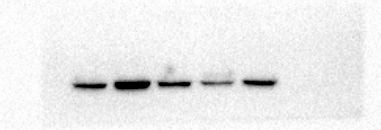

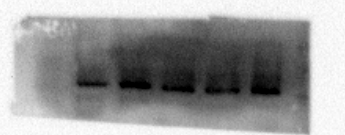


Nuc-YAP


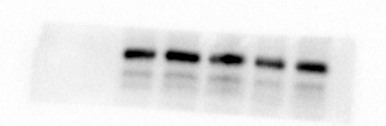

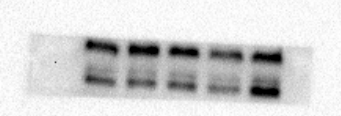


YAP

GAPDH

H3


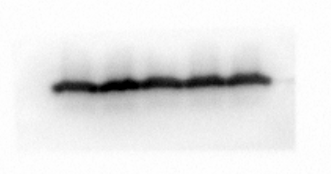

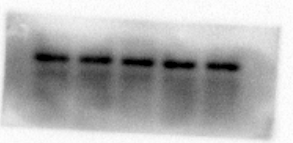


`

Fig.S3.The original blots generated alternative repeats of Western blotting analysis of Figure 3D.
